# Supplementary material
Source: publisher figshare collection journal article supplement (https://acs.figshare.com/ndownloader/files/4246522)

# SUPPLEMENTARY SECTION

All additional minima that were located in the potential energy surfaces of the complexes pairing  $\text{XPH}_2$  with  $\text{NH}_3$  are illustrated below, along with their counterpoise-corrected MP2/aug-cc-pVDZ interaction energies (kcal/mol) in blue. Distances in Å, angles in degs.

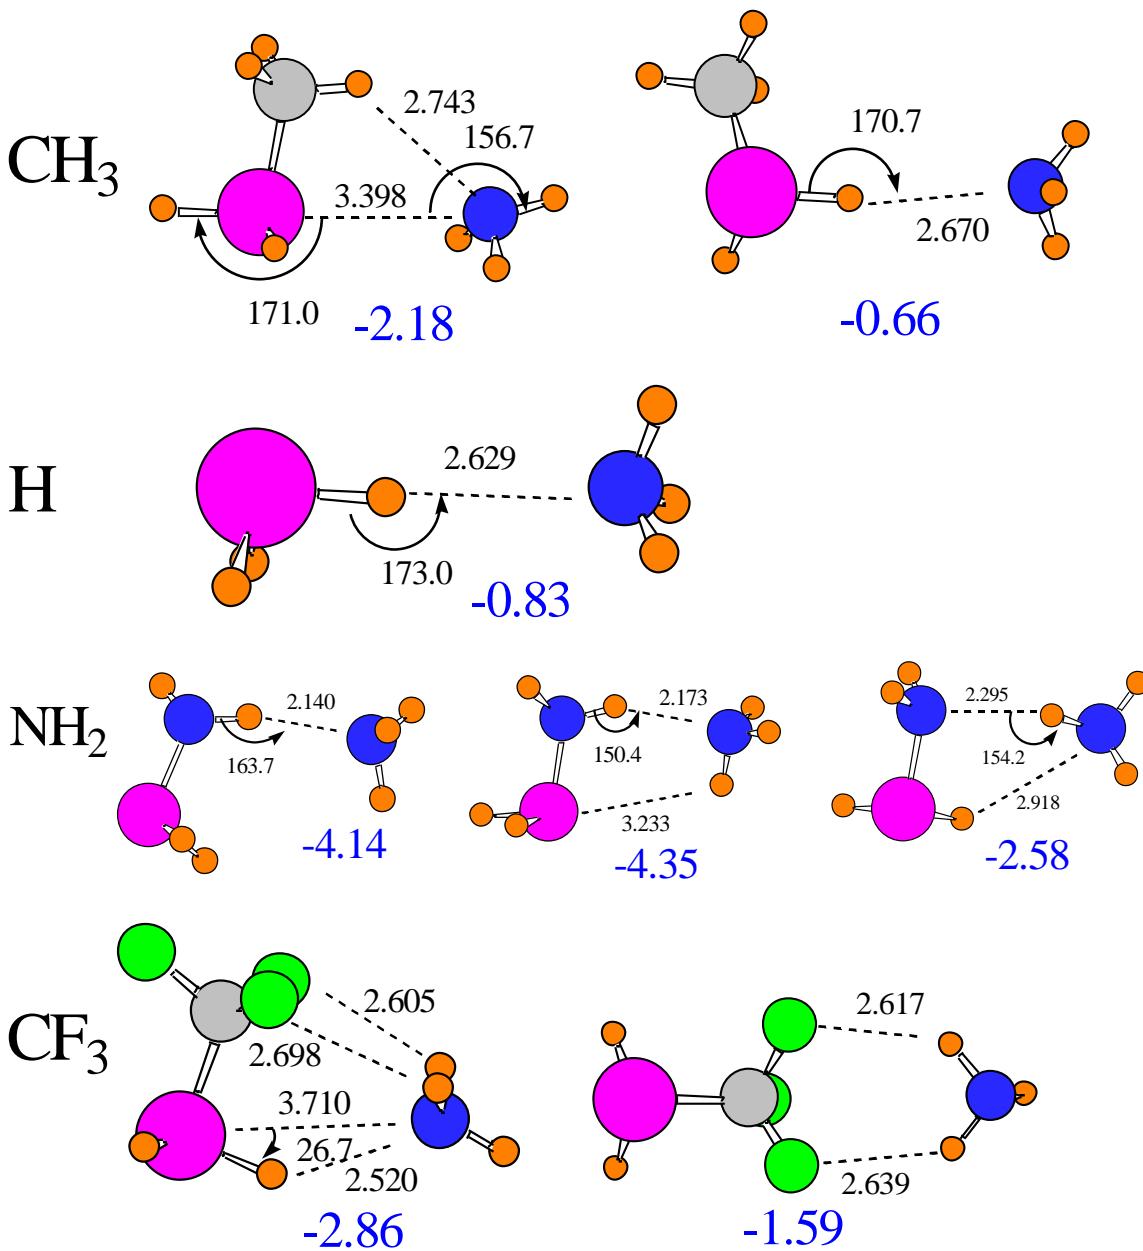

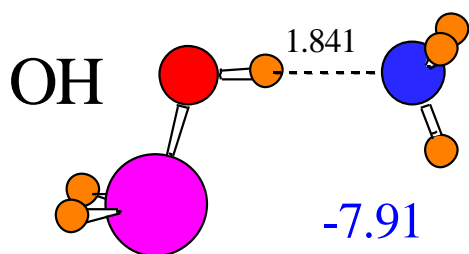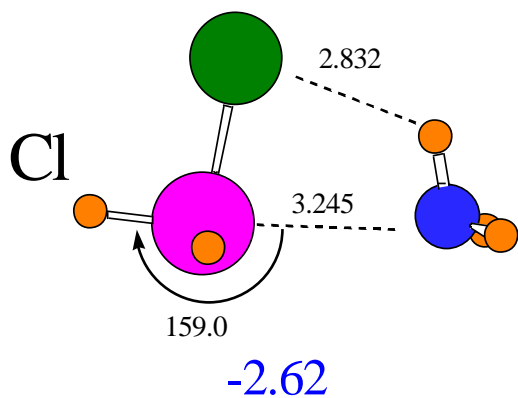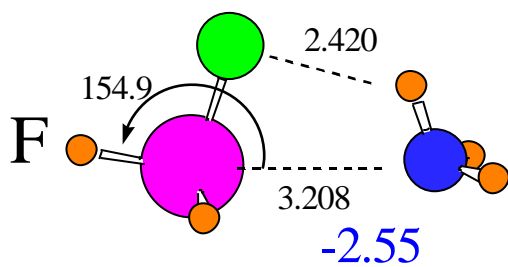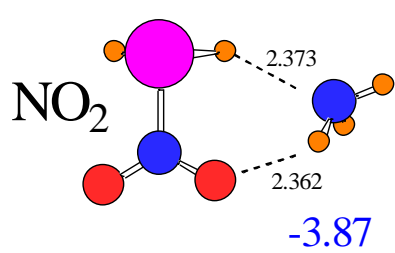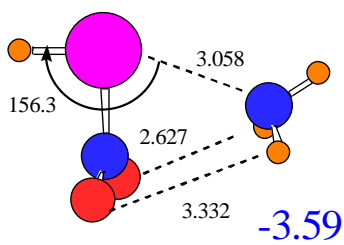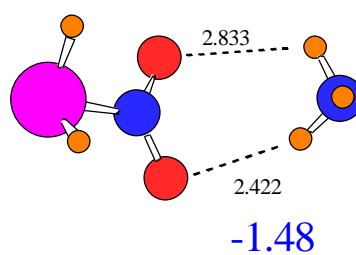

Supplement: Supplementary file 1 [file 4246522]
